# Supplementary material for: HOMA-IR and the Matsuda Index as predictors of progression to type 1 diabetes in autoantibody-positive relatives
Source: PubMed Central journal article supplement (PMC10789859; doi:10.1007/s00125-023-06034-y), 2023-11-02
Supplement: 125_2023_6034_MOESM1_ESM.pdf [file 125_2023_6034_MOESM1_ESM.pdf]

**Electronic supplementary material (ESM)**

**TABLES**

| Variable  | HOMA-IR<br>N=5611  |         |                       |        | MI<br>N=5611       |         |                       |        |
|-----------|--------------------|---------|-----------------------|--------|--------------------|---------|-----------------------|--------|
|           | Parameter Estimate | P value | 95% Confidence Limits |        | Parameter Estimate | P value | 95% Confidence Limits |        |
| Intercept | -0.498             | <.0001  | -0.553                | -0.443 | 2.606              | <.0001  | 2.555                 | 2.656  |
| BMIp      | 0.015              | <.0001  | 0.014                 | 0.016  | -0.014             | <.0001  | -0.015                | -0.013 |
| Intercept | -0.389             | <.0001  | -0.439                | -0.340 | 2.492              | <.0001  | 2.449                 | 2.535  |
| BMIp      | 0.013              | <.0001  | 0.012                 | 0.014  | -0.011             | <.0001  | -0.012                | -0.011 |
| Index60   | -0.283             | <.0001  | -0.299                | -0.268 | 0.294              | <.0001  | 0.281                 | 0.307  |
| Intercept | 0.048              | 0.0012  | 0.019                 | 0.078  | 2.112              | <.0001  | 2.085                 | 2.139  |
| Age       | 0.014              | <.0001  | 0.013                 | 0.015  | -0.014             | <.0001  | -0.015                | -0.013 |
| Intercept | 0.183              | <.0001  | 0.155                 | 0.211  | 1.972              | <.0001  | 1.948                 | 1.997  |
| Age       | 0.005              | <.0001  | 0.003                 | 0.006  | -0.004             | <.0001  | -0.005                | -0.003 |
| Index60   | -0.283             | <.0001  | -0.300                | -0.267 | 0.295              | <.0001  | 0.281                 | 0.310  |

**ESM Table 1. Associations (Not Adjusted and Adjusted) of BMIp or age with HOMA-IR or Matsuda Index adjusted for Index60.**

| Variable  | HOMA-IR<br>N=5611  |         |                       |        | MI<br>N=5611       |         |                       |        |
|-----------|--------------------|---------|-----------------------|--------|--------------------|---------|-----------------------|--------|
|           | Parameter Estimate | P value | 95% Confidence Limits |        | Parameter Estimate | P value | 95% Confidence Limits |        |
| Intercept | -0.498             | <.0001  | -0.553                | -0.443 | 2.606              | <.0001  | 2.555                 | 2.656  |
| BMIp      | 0.015              | <.0001  | 0.014                 | 0.016  | -0.014             | <.0001  | -0.015                | -0.013 |
| Intercept | -0.614             | <.0001  | -0.664                | -0.564 | 2.706              | <.0001  | 2.660                 | 2.751  |
| BMIp      | 0.012              | <.0001  | 0.011                 | 0.012  | -0.011             | <.0001  | -0.011                | -0.010 |
| IGI       | 0.274              | <.0001  | 0.259                 | 0.289  | -0.262             | <.0001  | -0.275                | -0.248 |
| Intercept | 0.048              | 0.0012  | 0.019                 | 0.078  | 2.112              | <.0001  | 2.085                 | 2.139  |
| Age       | 0.014              | <.0001  | 0.013                 | 0.015  | -0.014             | <.0001  | -0.015                | -0.013 |
| Intercept | -0.195             | <.0001  | -0.225                | -0.166 | 2.337              | <.0001  | 2.310                 | 2.364  |
| Age       | 0.010              | <.0001  | 0.009                 | 0.011  | -0.010             | <.0001  | 0.012                 | -0.009 |
| IGI       | 0.284              | <.0001  | 0.269                 | 0.299  | -0.268             | <.0001  | -0.281                | -0.255 |

**ESM Table 2. Associations (Not Adjusted and Adjusted) of BMIp or age with HOMA-IR or Matsuda Index adjusted IGI.** Indentations of rows under Variable heading indicate adjustments of BMIp and Age for IGI.

[Linear regression models for HOMA-IR and MI]

| HOMA-IR                         |                    |         |              | Matsuda Index      |         |              |
|---------------------------------|--------------------|---------|--------------|--------------------|---------|--------------|
| <i>Not Staged to 1 (N=2399)</i> |                    |         |              |                    |         |              |
| Parameter                       | Parameter Estimate | P value | Hazard Ratio | Parameter Estimate | P value | Hazard Ratio |
| Tertile 2 vs.1                  | -0.031             | 0.8359  | 0.969        | 0.214              | 0.1753  | 1.239        |
| Tertile 3 vs. 1                 | -0.076             | 0.6203  | 0.926        | 0.229              | 0.1446  | 1.258        |
| Tertile 2 vs.1                  | -0.032             | 0.8288  | 0.968        | 0.196              | 0.2240  | 1.217        |
| Tertile 3 vs. 1                 | -0.028             | 0.8609  | 0.972        | 0.237              | 0.1482  | 1.268        |
| IGI (NS)                        | 0.023              | 0.4543  | 1.024        | 0.035              | 0.3220  | 1.036        |
| <i>Stage 1 to 2 (N=3139)</i>    |                    |         |              |                    |         |              |
| Tertile 2 vs.1                  | -0.131             | 0.1156  | 0.877        | -0.288             | 0.0010  | 0.749        |
| Tertile 3 vs. 1                 | 0.148              | 0.0768  | 1.160        | -0.311             | 0.0002  | 0.732        |
| Tertile 2 vs.1                  | -0.064             | 0.4504  | 0.938        | -0.409             | <.0001  | 0.664        |
| Tertile 3 vs. 1                 | 0.285              | 0.0011  | 1.330        | -0.497             | <.0001  | 0.608        |
| IGI (St1)                       | -0.124             | <.0001  | 0.883        | -0.151             | <.0001  | 0.859        |

**ESM Table 3. Prediction of the risk of transitioning from Not Staged to Stage 1 and from Stage 1 to 2 type 1 diabetes by tertiles of HOMA-IR and Matsuda Index after adjustment for IGI.** Indentations of rows under Parameter heading indicate adjustments for Index60.

[Cox regression analysis (NT= Not Staged; St1= Stage); Not Staged (AAb<2 with normoglycemia) to Stage 1 (AAb≥2 with normoglycemia): IGI values at Not Staged used for adjustment; Stage 1 to Stage 2 (AAb≥2 associated with dysglycemia): IGI values at Stage 1 used for adjustment].

| HOMA-IR                         |                    |         |              | Matsuda Index      |         |              |
|---------------------------------|--------------------|---------|--------------|--------------------|---------|--------------|
| <i>Not Staged to 1 (N=2399)</i> |                    |         |              |                    |         |              |
| Parameter                       | Parameter Estimate | P value | Hazard Ratio | Parameter Estimate | P value | Hazard Ratio |
| Tertile 2 vs.1                  | -0.031             | 0.8359  | 0.969        | 0.214              | 0.1753  | 1.239        |
| Tertile 3 vs. 1                 | -0.076             | 0.6203  | 0.926        | 0.229              | 0.1446  | 1.258        |
| Tertile 2 vs.1                  | 0.013              | 0.9305  | 1.013        | 0.186              | 0.2423  | 1.206        |
| Tertile 3 vs. 1                 | 0.015              | 0.9226  | 1.015        | 0.150              | 0.3498  | 1.162        |
| Age (NS)                        | -0.019             | 0.0002  | 0.981        | -0.018             | 0.0003  | 0.981        |
| <i>Stage 1 to 2 (N=3138)</i>    |                    |         |              |                    |         |              |
| Tertile 2 vs.1                  | -0.131             | 0.1156  | 0.877        | -0.288             | 0.0010  | 0.749        |
| Tertile 3 vs. 1                 | 0.148              | 0.0768  | 1.160        | -0.311             | 0.0002  | 0.732        |
| Tertile 2 vs.1                  | -0.136             | 0.1066  | 0.872        | -0.276             | 0.0018  | 0.759        |
| Tertile 3 vs. 1                 | 0.132              | 0.1244  | 1.142        | -0.292             | 0.0008  | 0.746        |
| Age (St1)                       | 0.001              | 0.6718  | 1.001        | 0.000              | 0.9813  | 1.000        |

**ESM Table 4. Prediction of the risk of transitioning from Not Staged to Stage 1 and from Stage 1 to 2 type 1 diabetes by tertiles of HOMA-IR and Matsuda Index after adjustment for age.** Indentations of rows under Parameter heading indicate adjustments for Age.

[Cox regression analysis (NT= Not Staged; St1= Stage); Not Staged (AAb<2 with normoglycemia) to Stage 1 (AAb≥2 with normoglycemia): age values at Not Staged used for adjustment; Stage 1 to Stage 2 (AAb≥2 associated with dysglycemia): age values at Stage 1 used for adjustment].

| Parameter       | HOMA-IR<br>N=6114  |         |              | Parameter       | Matsuda Index<br>N=6256 |         |              |
|-----------------|--------------------|---------|--------------|-----------------|-------------------------|---------|--------------|
|                 | Parameter Estimate | P value | Hazard Ratio |                 | Parameter Estimate      | P value | Hazard Ratio |
| Tertile 2 vs.1  | 0.210              | 0.0033  | 1.234        | Tertile 2 vs. 1 | -0.418                  | <.0001  | 0.658        |
| Tertile 3 vs. 1 | 0.617              | <.0001  | 1.854        | Tertile 3 vs. 1 | -0.619                  | <.0001  | 0.538        |
| IGI (baseline)  | -1.466             | <.0001  | 0.231        | IGI (baseline)  | -1.478                  | <.0001  | 0.228        |
| Tertile 2 vs.1  | 0.354              | <.0001  | 1.425        | Tertile 1 vs. 3 | -0.534                  | <.0001  | 0.586        |
| Tertile 3 vs. 1 | 0.843              | <.0001  | 2.324        | Tertile 2 vs. 3 | 0.012                   | <.0001  | 0.402        |
| Age (baseline)  | -1.325             | <.0001  | 0.266        | Age (baseline)  | -0.028                  | <.0001  | 0.256        |
| Age (baseline)  | -0.038             | <.0001  | 0.962        | Age (baseline)  | -0.049                  | <.0001  | 0.960        |

**ESM Table 5. Prediction of the risk of progression to Stage 3 type 1 diabetes by tertiles of HOMA-IR and Matsuda Index after adjustment for IGI and age.**

Indentations of rows under Parameter heading indicate adjustments of for IGI and Age.

[Cox regression analysis with baseline IGI, or IGI and age, as covariates for adjustment.

Baseline: monitoring visit when the initial OGTT was performed]

## SUPPLEMENTARY FIGURES

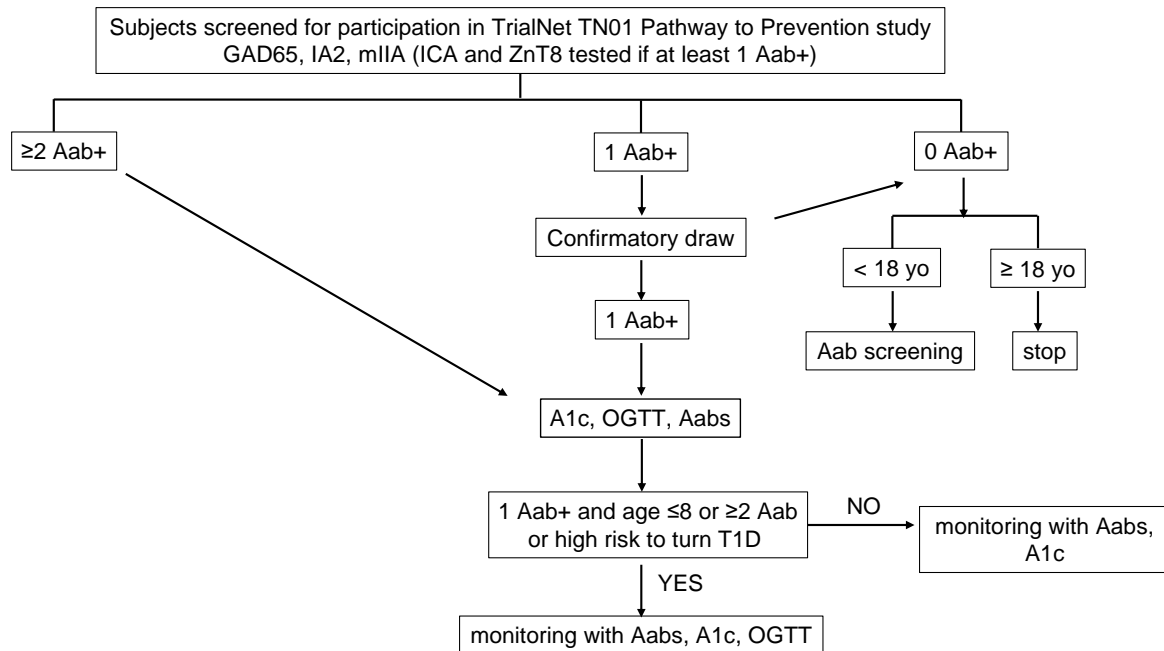

**ESM Figure 1. Study design.** Participants enrolled in the TN01 TrialNet Pathway to Prevention Study were first- and second-degree relatives of patients with type 1 diabetes screened for islet autoantibodies. They were tested for the presence of glutamic acid decarboxylase autoantibodies (GAD65), insulin (microinsulin antibody, mIIA) and insulinoma-associated antigen 2 (IA-2A). If tested positive for at least 1 AAb+, they were tested also for zinc transporter 8 antibody (ZnT8A) and islet cell antibody (ICA). Participants without autoantibodies (0 AAb+) younger than 18 years old were followed for autoantibody screening, whereas participants older than 18 years old were no longer monitored. Participants positive for a single autoantibody (1 AAb+, confirmed twice) or positive for 2 or more autoantibodies ( $\geq 2$  AAb+), were tested for glycated haemoglobin, oral glucose tolerance test and autoantibodies. Participants with 1 AAb+ younger than 8 years old and participants with  $\geq 2$  AAb+ or at high risk to turn diabetic were monitored with autoantibodies, glycated haemoglobin and OGTT.

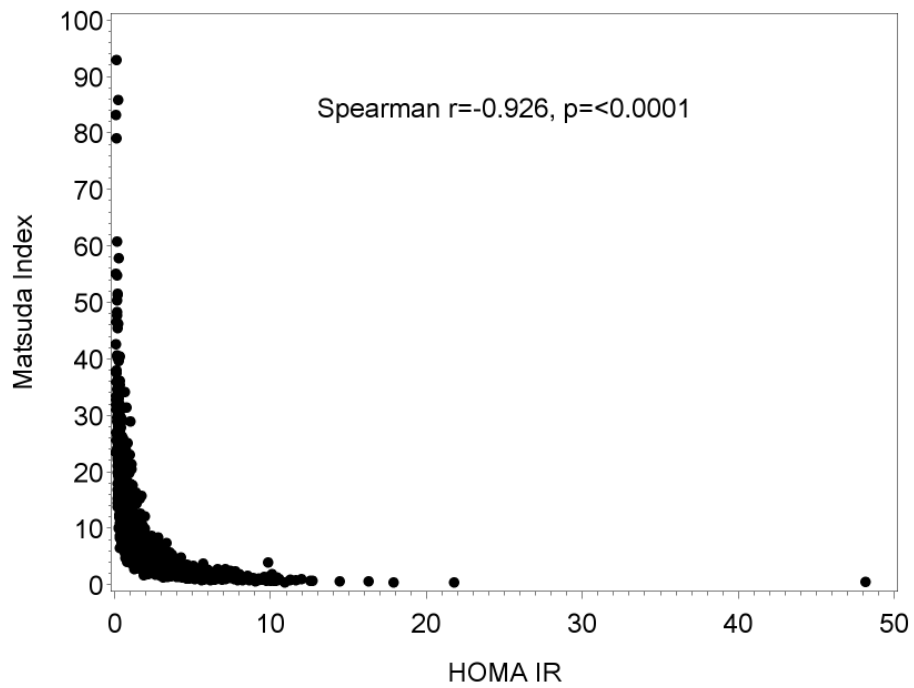

**ESM Fig 2. Correlation between HOMA-IR and Matsuda Index.**  
Curvilinear inverse relationship is evident between HOMA-IR and Matsuda Index.  
Spearman's rank correlation coefficient  $r=-0.926$

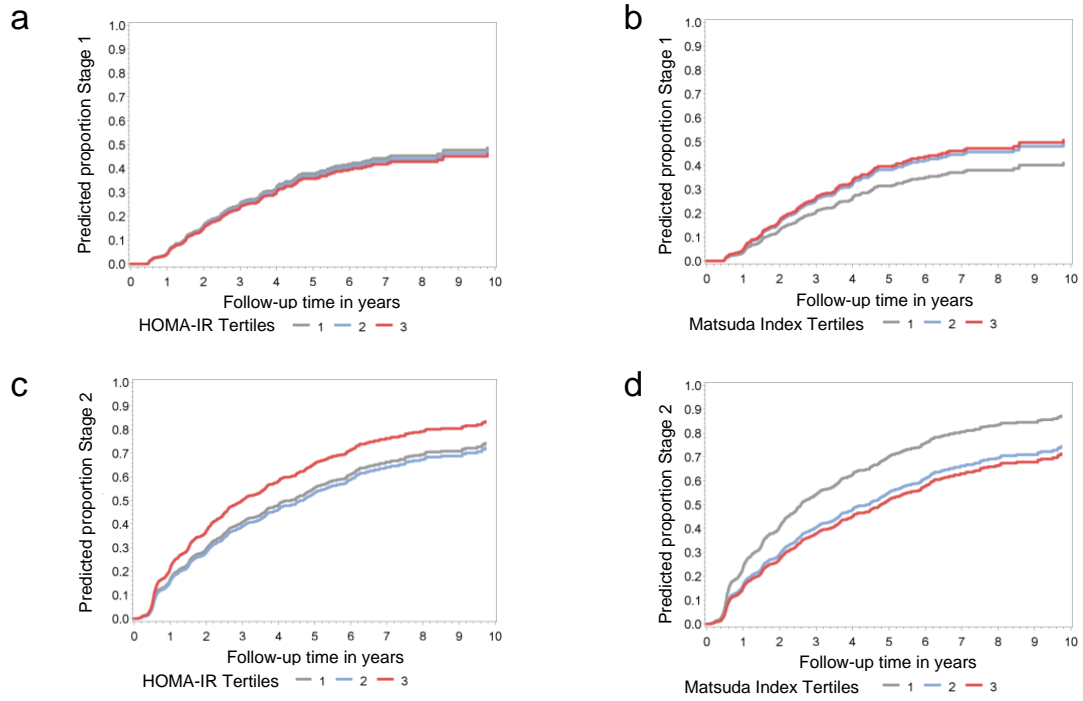

**ESM Fig 3.** Predicted survival functions of time from Not Staged to Stage 1 (a-b) and from Stage 1 to Stage 2 by tertiles of HOMA-IR (a-c) and Matsuda Index (b-d) based on a Cox Regression analysis adjusted for IGI. Estimates were determined based on the median values of IGI (ie. 0.76).



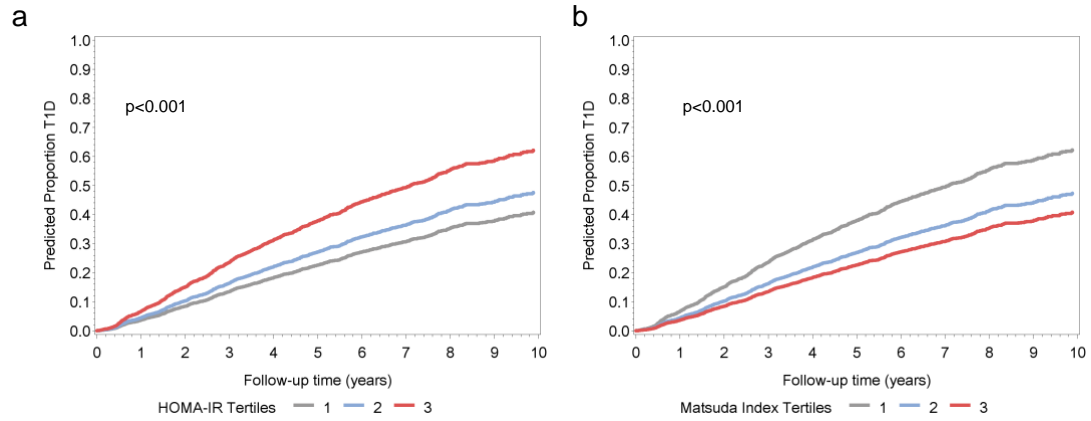

**ESM Fig 4.** Predicted survival functions of time to T1D by tertiles of HOMA-IR (a) and Matsuda Index (b) based on a Cox Regression analysis adjusted for IGI. Estimates were determined based on the median values of IGI (i.e. 0.76).
